# Supplementary material
Source: publisher figshare collection journal article supplement (https://gsapubs.figshare.com/ndownloader/files/33608324)
Supplement: Supplementary file 1 [file 33608324]

## Sheet: Table A5
	Supplemental Material 4.
	TABLE S5. MAGMA AND LAVA VISCOSITIES OF NEALTICAN LAVAS FOR PRE- AND SYN-ERUPTION CONDITIONS, CALCULATED FOLLOWING THE PETROLOGICAL APPROACH THAT ACCOUNTS FOR THE CHEMICAL COMPOSITION OF THE BULK GROUNDMASS AND THE RESIDUAL LIQUID, THERMO-BAROMETRY, HYGROMETRY, AND CRYSTAL VOLUME
	Pre-eruptive conditions			vol.% of Phenocrysts			Bulk groundmass composition in wt.%, normalised to 100 %												Parameters from Giordano et al. (2008)
	Sample	Flow unit	Mineral assemblage:	Angular prolate (Plg)	Angular equant (Px+Ol)	ƞr	SiO2	TiO2	Al2O3	FeO(T)	MnO	MgO	CaO	Na2O	K2O	P2O5	H2O	TOTAL	A	B	C	T (°C)	log ƞLiquid (Pa.s)	ƞLiquid (Pa·s)	ƞapp (Pa·s)	log ƞapp (Pa·s)
	PO09	F1	Plg+Px+Ol	25	5	22.9098	64.813	1.259	13.282	5.59	0.099	3.053	4.193	4.222	2.28	0.317	0.892	100	-4.55	8671.8	305.1	1125	3.4	2400	55000	4.7
	PO41	F1	Plg+Px+Ol	26	5	33.492	64.221	1.366	13.226	6.049	0.109	3.534	3.208	4.366	2.584	0.347	0.99	100	-4.55	8551.2	294.2	1119	3.2	1740	58200	4.8
	PO54	F2	Plg+Px+Ol	24	5	16.308	64.192	1.328	13.627	5.768	0.099	3.132	4.004	4.232	2.398	0.327	0.892	99.999	-4.55	8583.2	308.9	1124	3.3	2190	35700	4.6
	PO32	F3	Plg+Px+Ol	24	5	16.308	65.327	1.086	14.009	6.318	0.109	1.609	3.436	4.156	2.409	0.257	1.283	99.999	-4.55	8907.7	264.4	1055	3.8	6610	108000	5
	PO28	F3	Plg+Px+Ol	33	6	614.152	65.778	1.086	14.007	5.942	0.109	1.569	3.682	3.82	2.468	0.257	1.283	100.001	-4.55	8996.4	266.8	1049	3.97	9332.54	5.7316e+06	6.75828
	PO18	F4	Plg+Px	31	6	277.45	67.331	1.017	13.298	5.539	0.089	1.432	3.515	3.969	2.271	0.257	1.283	100.001	-4.55	9263.7	251.3	925	5.2	170000	47100000	7.7
	PO16	F4	Plg+Px+Ol	29	7	126.065	66.884	1.036	13.521	5.533	0.089	1.578	3.235	4.152	2.377	0.217	1.381	100.003	-4.55	9175.1	244.8	925	5.1	117000	14800000	7.2
	Syn-eruptive conditions			vol.% of Phenocrysts + Microphenocrysts		Composition of glass (interstitial liquid) in wt.%, normalised to 100 %													Parameters from Giordano et al. (2008)
	Sample	Flow unit	Mineral assemblage:	Angular prolate (Plg)	Angular equant (Px+Ol)	ƞr	SiO2	TiO2	Al2O3	FeO(T)	MnO	MgO	CaO	Na2O	K2O	P2O5	H2O	TOTAL	A	B	C	T (°C)	log ƞLiquid (Pa.s)	ƞLiquid (Pa·s)	ƞapp (Pa·s)	log ƞapp (Pa·s)
	PO09	F1	Plg+Px+Ol	44	15	35746.7	72.49	0.86	13.14	3.15	0.05	0.31	1.12	3.78	4.99	n.a.	0.1	99.99	-4.55	10927.9	308.4	1065	6.06	1.14815e+06	41000000000	10.6128
	PO41	F1	Plg+Px+Ol	40	13	11272.1	74.3	0.54	13.44	1.68	0.01	0.05	0.77	4.21	4.81	0.09	0.1	100	-4.55	11379.8	285.8	1064	6.27	1.86209e+06	21000000000	10.3222
	PO54	F2	Plg+Px+Ol	35	13	1865.47	74.3	0.54	13.44	1.68	0.01	0.05	0.77	4.21	4.81	0.09	0.1	100	-4.55	11379.8	285.8	1071	6.2	1.58489e+06	2960000000	9.47129
	PO32	F3	Plg+Px+Ol	32	13	462.78	74.3	0.54	13.44	1.68	0.01	0.05	0.77	4.21	4.81	0.09	0.1	100	-4.55	11379.8	285.8	1055	6.37	2.34423e+06	1.08486e+09	9.03537
	PO28	F3	Plg+Px+Ol	45	13	40344.9	74.3	0.54	13.44	1.68	0.01	0.05	0.77	4.21	4.81	0.09	0.1	100	-4.55	11379.8	285.8	1049	6.43	2.69153e+06	1.0859e+11	11.0358
	PO18	F4	Plg+Px	40	14	12518.7	75.28	0.56	12.47	1.79	0.02	0.11	0.52	3.49	5.63	0.04	0.1	100.01	-4.55	11584.8	277.6	925	8.04	1.09648e+08	1370000000000	12.1367
	PO16	F4	Plg+Px+Ol	38	14	5835.61	75.28	0.56	12.47	1.79	0.02	0.11	0.52	3.49	5.63	0.04	0.1	100.01	-4.55	11584.8	277.6	925	8.04	1.09648e+08	640000000000	11.8062
	Abbreviations: Plagioclase (Plg), Pyroxene (Px), and Olivine (Ol).
	ηr =ηr spheres × ηr prolates calculated from Costa et al. (2009) and fitting parameter from Cimarelli et al. (2011).
	ηLiquid calculated from Giordano et al. (2008)
	ηapp = ηr × ƞLiquid
